# Supplementary material
Source: PubMed Central journal article supplement (PMC5726765)
Supplement: NIHMS922944-supplement-Supplemental_info.pdf [file NIHMS922944-supplement-Supplemental_info.pdf]

1 **S.I.**

2 **Image Alignment and Segmentation Method**

3 For image alignment, we applied translational and rotational transform and used the  
4 combination that renders the largest cross-correlation coefficient of the two bright-field images  
5 (SI Fig 1 (A)). For nucleus segmentation, we first used the transformation matrix from the image  
6 alignment and aligned the PWS  $\Sigma$  map. Then we manually cropped out the nucleus region and  
7 cytoplasm region with care on the false color overlaid image (SI Fig 1 (B)) for quantitative  
8 analysis.

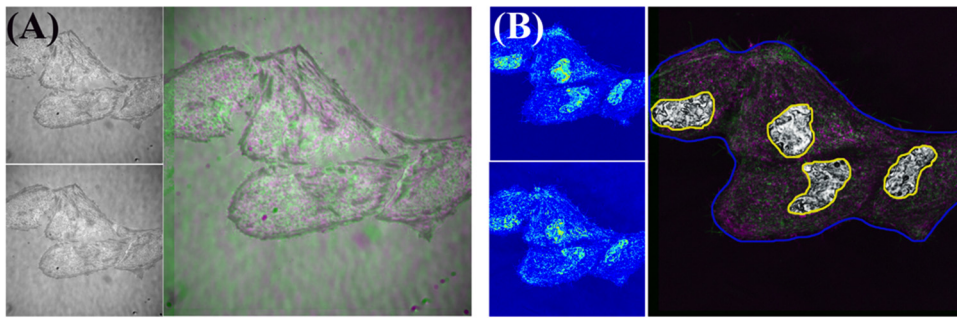

9

10 SI Fig 1 Example of image alignment and segmentation. (A) Bright field reflection images of live *HeLa*  
11 (upper left), *HeLa* after 20 minutes 4% PFA fixation (lower left). The false color image overlay (right)  
12 showed good match after alignment. (B) PWS  $\Sigma$  map of the same cells. After alignment, nucleus region  
13 (yellow contour) and cytoplasm region (blue contour) were cropped out manually on the false color  
14 overlaid image.

15

16 **PWS Visualization of Mass-Density Re-distribution Due to Normal Cell Dynamics**

17 Ideal fixation, such as high-pressure freezing, will “freeze” the cell structure and dynamics  
18 at a glance. Under ideal circumstances, the mass-density distribution after fixation and right

19 before fixation should be the same. Thus we employed PWS measurements of the same cells under  
20 incubator condition 1 minute apart (SI Fig 2) to estimate the goodness of fixation.

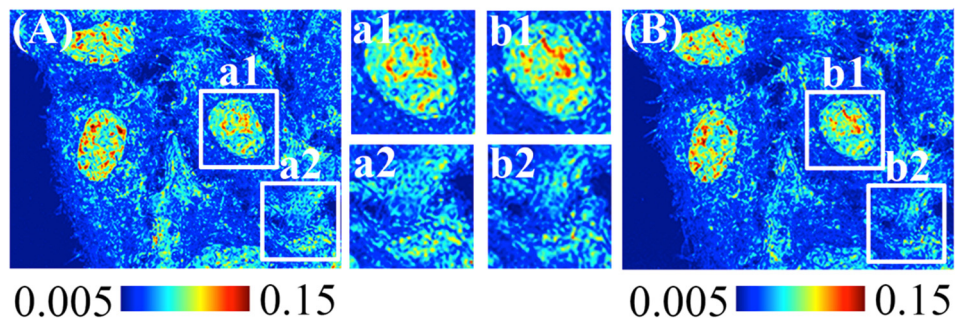

21  
22 SI Fig 2 PWS  $\Sigma$  map of the same live *HeLa* cells 1 minute apart. The insets showed higher magnification of  
23 the mass-density mismatch of nucleus and cytoplasm region. For both regions, mass-density underwent re-  
24 distribution due to normal cell dynamics. (A) At time zero, (B) at 1 minute after.

25

## 26 **PWS Measurement of *HeLa* Cells After Resin Infiltration**

27 We compared the PWS measurements between live cells and resin-infiltrated cells. The  
28 cells had been processed followed the TEM resin embedding protocol. The range of PWS  $\Sigma$  map is  
29 smaller after resin infiltration than that right after serial ethanol dehydration. This is because the  
30 density of Spurr's resin ( $1.1\text{g/cm}^3$ ) is similar to the density of protein ( $\sim 1.2\text{g/cm}^3$ ). As a result,  
31 the absolute value in mass-density mismatch is suppressed as well.

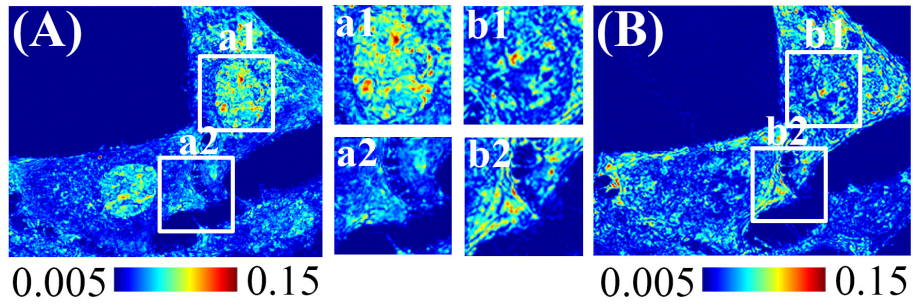

32

33 SI Fig 3 PWS  $\Sigma$  map of the same *HeLa* cells before and after resin infiltration. (A) Live-cell and (B) infiltrated  
 34 by resin following the TEM resin-embedding protocol. The insets are higher magnification images of  
 35 nucleus and cytoplasm region. Dramatic change was shown in the nucleus region.

36

37 **Tables of Statistical Parameters Calculated from PWS  $\Sigma$  Map**

38 Multiple *HeLa* cells were measured by PWS: 61 for PFA, 114 for ethanol, 69 for TEM  
 39 fixation, 75 for live cell dynamics control, and 22 for TEM resin infiltration. Statistical parameters  
 40 were calculated and tabulated for time lapse live cells (SI Table 1), PFA fixation (SI Table 2),  
 41 ethanol fixation (SI Table 3), TEM resin-embedding fixation without resin embedding (SI Table 4),  
 42 and TEM resin-embedding fixation with resin infiltration (SI Table 5).

43

44

SI Table 1 Statistics of Cells Captured 1 Minutes Apart

45

(75 Cells)

| Nucleus     | Average     |             | Cytoplas<br>m | Average     |             |
|-------------|-------------|-------------|---------------|-------------|-------------|
|             | Time 0      | 1 Min Later |               | Time 0      | 1 Min Later |
| <b>Mean</b> | 0.055±0.005 | 0.054±0.004 | <b>Mean</b>   | 0.031±0.003 | 0.031±0.003 |

|                 |            |            |                 |            |            |
|-----------------|------------|------------|-----------------|------------|------------|
| <b>CV</b>       | 0.41±0.02  | 0.41±0.02  | <b>CV</b>       | 0.48±0.02  | 0.48±0.02  |
| <b>Kurtosis</b> | 3.25±0.29  | 3.30±0.30  | <b>Kurtosis</b> | 5.11±1.07  | 5.20±0.84  |
| <b>Skewness</b> | 0.55±0.13  | 0.56±0.15  | <b>Skewness</b> | 1.17±0.21  | 1.21±0.19  |
| <b>Entropy</b>  | 14.96±0.38 | 14.96±0.38 | <b>Entropy</b>  | 17.37±0.25 | 17.37±0.25 |
| <b>CCC</b>      | 1          | 0.49±0.07  | <b>CCC</b>      | 1          | 0.53±0.07  |

46

47

48

49

50

51

52

For live cells measured 1min apart (SI Table1), all parameters were stable regardless of the rearrangement of mass-density distribution caused by the vibrant cell dynamics. In other words, the bulk properties of PWS  $\Sigma$  map are only structural dependent.

SI Table 2 Statistics of Cells Before and After PFA Fixation

(61 Cells)

| <b>Nucleus</b>  | <b>Average</b> |             | <b>Cytoplasm</b> | <b>Average</b> |             |
|-----------------|----------------|-------------|------------------|----------------|-------------|
|                 | Live           | PFA         |                  | Live           | PFA         |
| <b>Mean</b>     | 0.055±0.006    | 0.048±0.004 | <b>Mean</b>      | 0.031±0.005    | 0.035±0.005 |
| <b>CV</b>       | 0.407±0.027    | 0.414±0.019 | <b>CV</b>        | 0.50±0.03      | 0.47±0.03   |
| <b>Kurtosis</b> | 3.32±0.23      | 3.48±0.46   | <b>Kurtosis</b>  | 5.03±1.11      | 5.35±1.43   |
| <b>Skewness</b> | 0.58±0.12      | 0.80±0.13   | <b>Skewness</b>  | 1.07±0.24      | 1.16±0.25   |
| <b>Entropy</b>  | 12.15±0.02     | 11.95±0.18  | <b>Entropy</b>   | 11.80±0.24     | 11.87±0.26  |
| <b>CCC</b>      | 1              | 0.23±0.06   | <b>CCC</b>       | 1              | 0.35±0.07   |

53

54

55

In 4% PFA Fixation, for nucleus region, the more than 10% drop in mean value and almost 38% increase in skew suggested the dominance of smaller mass clusters after fixation and a

56 relatively more homogeneous overall distribution. The last point was also validated by the slightly  
 57 decreased value in entropy. However, the kurtosis and CV of the nucleus region were consistent,  
 58 with less than 2% decrease respectively, which indicated the PFA fixation didn't change the  
 59 symmetry of the mass-density distribution.

60 The effects of PFA on the cytoplasm are not exactly the same as on the nucleus. For  
 61 example, the mean value and CV in the cytoplasm both increased after PFA fixation. This showed  
 62 clearly that the mass-density had more fluctuations, probably due to the cross-linking process.  
 63 The kurtosis and the skewness increased while the entropy remained almost constant.

64

65 SI Table 3 Statistics of *HeLa* cells before and after 95% ethanol fixation

66

(114 Cells)

| Nucleus         | Average     |             | Cytoplasm       | Average     |             |
|-----------------|-------------|-------------|-----------------|-------------|-------------|
|                 | Live        | ETOH        |                 | Live        | ETOH        |
| <b>Mean</b>     | 0.043±0.001 | 0.200±0.039 | <b>Mean</b>     | 0.026±0.003 | 0.144±0.028 |
| <b>CV</b>       | 0.44±0.02   | 0.39±0.04   | <b>CV</b>       | 0.47±0.02   | 0.44±0.04   |
| <b>Kurtosis</b> | 3.15±0.23   | 3.15±0.31   | <b>Kurtosis</b> | 8.17±1.62   | 4.21±0.58   |
| <b>Skewness</b> | 0.59±0.09   | 0.59±0.10   | <b>Skewness</b> | 1.59±0.16   | 0.84±0.15   |
| <b>Entropy</b>  | 12.14±0.10  | 13.82±0.20  | <b>Entropy</b>  | 11.43±0.21  | 13.82±0.21  |
| <b>CCC</b>      | 1           | 0.13±0.03   | <b>CCC</b>      | 1           | 0.04±0.07   |

67

68 For 95% ETOH fixation (SI Table 3), the most dramatic change was in mean values with  
 69 magnitudes of increasing for both nucleus and cytoplasm region. This can be explained by the  
 70 shrinkage in volume and resulting condensed density caused by EtOH. However, the kurtosis and

71 skewness showed opposite trend for nucleus and cytoplasm: the skewness and kurtosis increased  
 72 for the nucleus but dropped significantly for the cytoplasm. For the nucleus, this indicated that  
 73 the mass-density distribution started from a normal distribution (kurtosis =3) and ended with a  
 74 less normal distribution, with more small mass clusters than big ones. For the cytoplasm, this  
 75 decreased skewness and kurtosis suggested the dominance of a small density mismatch. This  
 76 might be the result of deposition of small particles during ethanol fixation.

77

78 SI Table 4 Statistics of Cells at Different Stages of Preparation for TEM Resin Section

79

(69 Cells)

| <b>Nucleus</b>      | <b>Live</b> | <b>GA and FA</b> | <b>OsO<sub>4</sub></b> | <b>Serial ETOH</b> |
|---------------------|-------------|------------------|------------------------|--------------------|
| <b>Mean</b>         | 0.048±0.005 | 0.046±0.003      | 0.078±0.008            | 0.062±0.007        |
| <b>CV</b>           | 0.41±0.03   | 0.40±0.03        | 0.43±0.02              | 0.45±0.02          |
| <b>Kurtosis</b>     | 3.15±0.34   | 3.92±0.63        | 3.89±1.25              | 4.81±1.32          |
| <b>Skewness</b>     | 0.49±0.23   | 0.85±0.15        | 0.85±0.19              | 1.11±0.24          |
| <b>Entropy</b>      | 11.96±0.27  | 11.87±0.27       | 12.50±0.41             | 12.28±0.36         |
| <b>Absolute CCC</b> | 1           | 0.28±0.09        | 0.19±0.07              | 0.07±0.06          |
| <b>Relative CCC</b> | 1           | 0.28±0.09        | 0.36±0.10              | 0.25±0.08          |
| <b>Cytoplasm</b>    | <b>Live</b> | <b>GA and FA</b> | <b>OsO<sub>4</sub></b> | <b>Serial ETOH</b> |
| <b>Mean</b>         | 0.030±0.006 | 0.043±0.008      | 0.083±0.018            | 0.078±0.014        |
| <b>CV</b>           | 0.47±0.02   | 0.51±0.02        | 0.56±0.04              | 0.57±0.03          |
| <b>Kurtosis</b>     | 5.46±1.98   | 6.59±1.84        | 6.71±2.27              | 7.05±3.55          |
| <b>Skewness</b>     | 1.14±0.35   | 1.39±0.34        | 1.43±0.37              | 1.41±0.39          |

|                     |            |            |            |            |
|---------------------|------------|------------|------------|------------|
| <b>Entropy</b>      | 11.66±0.31 | 12.19±0.31 | 13.16±0.37 | 13.15±0.28 |
| <b>Absolute CCC</b> | 1          | 0.35±0.07  | 0.35±0.07  | 0.31±0.06  |
| <b>Relative CCC</b> | 1          | 0.35±0.07  | 0.49±0.07  | 0.55±0.06  |

80

81 For TEM resin-embedding protocols, the fixatives were added in a specific sequence. First  
82 of all, the GA and FA fixation changed the nucleus regional mean value and CV by only less than  
83 5% difference compared with live cells. With 22% increase in kurtosis and 73% increase in  
84 nucleus skewness, we can deduce the distribution of mass-density has experienced dramatic  
85 change. For Cytoplasm, major changes occurred after GA and FA fixation and remained relatively  
86 stable in the following steps. The mean value increased significantly (43%) after GA and FA  
87 fixation. The increased mass-density in cytoplasm as a result of volume loss during fixation can  
88 serve as a possible explanation. The obvious increase in kurtosis and skewness indicate a more  
89 peaked and asymmetric structure with small mass dominance even before OsO<sub>4</sub> fixation and  
90 ethanol dehydration.

91 Secondly, the OsO<sub>4</sub> fixation enhanced the overall contrast in PWS with almost doubled  
92 mean value (70% increase), but the overall distribution didn't change much, as the CV, kurtosis  
93 and skewness were relatively stable. It seems that the GA and FA efficiently cross-linked the  
94 protein and nucleic acids, and OsO<sub>4</sub> stained that entire cell evenly.

95 Following heavy metal staining, the serial ethanol dehydration reduced the mean value by  
96 washing away loosely bonded or unbounded OsO<sub>4</sub>. The CV was quite stable for all treatment  
97 within the nucleus, but the distribution was largely difference from live cells. Kurtosis and  
98 skewness were increased by 52% and by 126%, respectively. This indicates that, as cells are

99 dehydrated, small chunks of material were re-deposited to the cells and resulting in a very  
 100 asymmetric distribution peaked at small values.

101

102

SI Table 5 Statistics of Live Cells and Cells Infiltrated with Resin after Fixation

103

(22 Cells)

| Nucleus         | Average     |             | Cytoplasm       | Average     |             |
|-----------------|-------------|-------------|-----------------|-------------|-------------|
|                 | Live        | Infiltrated |                 | Live        | Infiltrated |
| <b>Mean</b>     | 0.053±0.006 | 0.033±0.004 | <b>Mean</b>     | 0.033±0.003 | 0.044±0.002 |
| <b>CV</b>       | 0.38±0.05   | 0.51±0.03   | <b>CV</b>       | 0.47±0.03   | 0.57±0.04   |
| <b>Kurtosis</b> | 3.16±0.35   | 4.58±0.61   | <b>Kurtosis</b> | 4.62±1.30   | 5.14±1.21   |
| <b>Skewness</b> | 0.45±0.28   | 2.25±0.13   | <b>Skewness</b> | 0.95±0.25   | 1.16±0.19   |
| <b>Entropy</b>  | 13.84±0.99  | 13.84±0.99  | <b>Entropy</b>  | 16.44±0.85  | 16.44±0.85  |
| <b>CCC</b>      | 1           | 0.12±0.04   | <b>CCC</b>      | 1           | 0.28±0.07   |

104

105 Lastly, resin infiltration homogenized the mass-density distribution inside nucleus and  
 106 reduced the correlation between treated cells and live cells even more.

107

### 108 Bulk Property Correlation

109 We calculated the correlation and linear coefficient of bulk properties in different fixation  
 110 stage for nucleus and cytoplasm, respectively (SI Fig 4).

111

112



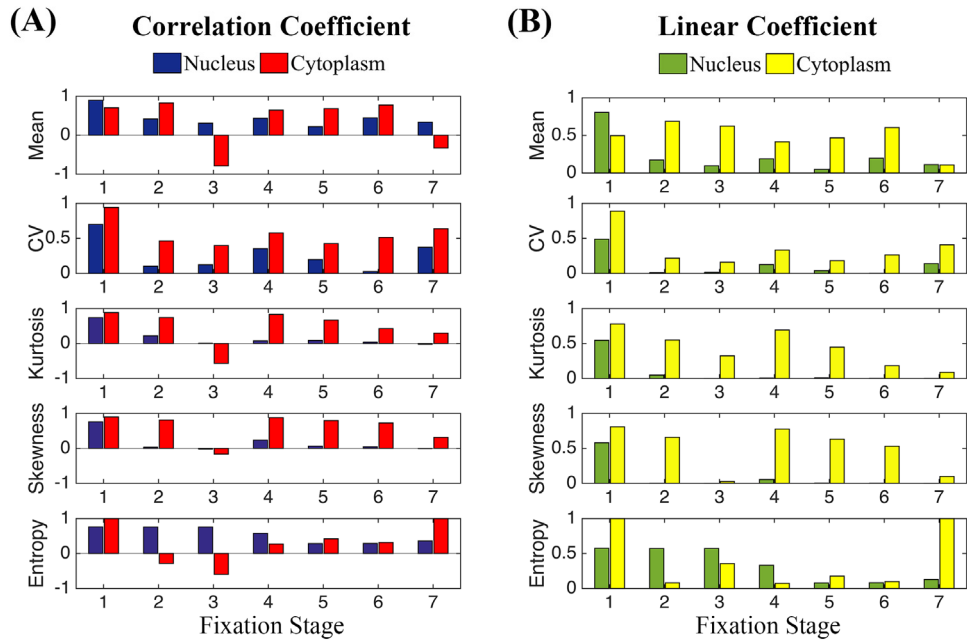

113

114 SI Fig 4 Correlation of the bulk properties between live cells and cells at different stage of treatments. For  
 115 both (A) correlation coefficient, and (B) linear coefficient, steps 1 to 7 stand for 1. Live cell sequence 1 min  
 116 apart, 2. 4% PFA, 3. 95% EtOH, 4. 2.5% GA & 2% FA, 5. 1% OsO<sub>4</sub>, 6. Serial EtOH, 7. Resin embedding.

117

118

SI Table 6 Correlations of Bulk Statistics

| Nucleus                 | Correlation Coefficient |       |          |          |         | Linear Coefficient |       |          |          |         |
|-------------------------|-------------------------|-------|----------|----------|---------|--------------------|-------|----------|----------|---------|
|                         | Mean                    | CV    | Kurtosis | Skewness | Entropy | Mean               | CV    | Kurtosis | Skewness | Entropy |
| Live (1min Apart)       | 0.90                    | 0.80  | 0.74     | 0.76     | 0.76    | 0.81               | 0.49  | 0.55     | 0.58     | 0.58    |
| PFA                     | 0.42                    | 0.10  | 0.22     | 0.033    | 0.76    | 0.17               | 0.011 | 0.049    | 0.0011   | 0.57    |
| ETOH                    | 0.31                    | 0.12  | 0.01     | -0.017   | 0.76    | 0.095              | 0.015 | 0.00012  | 0.00028  | 0.57    |
| TEM (GA&FA)             | 0.43                    | 0.35  | 0.075    | 0.23     | 0.58    | 0.19               | 0.13  | 0.0056   | 0.055    | 0.33    |
| TEM (OsO <sub>4</sub> ) | 0.22                    | 0.20  | 0.087    | 0.064    | 0.28    | 0.049              | 0.030 | 0.0076   | 0.0040   | 0.080   |
| TEM (ETOH)              | 0.44                    | 0.027 | 0.040    | 0.043    | 0.29    | 0.20               | 0.001 | 0.0016   | 0.0019   | 0.082   |

|                         |                                |      |          |          |         |                           |      |          |          |         |
|-------------------------|--------------------------------|------|----------|----------|---------|---------------------------|------|----------|----------|---------|
| TEM (Resin)             | 0.33                           | 0.37 | -0.026   | -0.0035  | 0.36    | 0.11                      | 0.14 | 0.00065  | 0.000012 | 0.13    |
| <b>Cytoplasm</b>        | <b>Correlation Coefficient</b> |      |          |          |         | <b>Linear Coefficient</b> |      |          |          |         |
|                         | Mean                           | CV   | Kurtosis | Skewness | Entropy | Mean                      | CV   | Kurtosis | Skewness | Entropy |
| Live (1min Apart)       | 0.71                           | 0.94 | 0.88     | 0.90     | 1       | 0.45                      | 0.89 | 0.78     | 0.81     | 1       |
| PFA                     | 0.83                           | 0.46 | 0.74     | 0.81     | -0.28   | 0.67                      | 0.22 | 0.55     | 0.66     | 0.08    |
| ETOH                    | 0.79                           | 0.34 | -0.57    | -0.16    | -0.60   | 0.62                      | 0.16 | 0.32     | 0.027    | 0.36    |
| TEM (GA&FA)             | 0.65                           | 0.58 | 0.83     | 0.88     | 0.27    | 0.42                      | 0.33 | 0.69     | 0.78     | 0.073   |
| TEM (OsO <sub>4</sub> ) | 0.68                           | 0.43 | 0.67     | 0.80     | 0.42    | 0.47                      | 0.18 | 0.45     | 0.63     | 0.18    |
| TEM (ETOH)              | 0.78                           | 0.51 | 0.43     | 0.73     | 0.31    | 0.61                      | 0.26 | 0.18     | 0.53     | 0.098   |
| TEM (Resin)             | 0.33                           | 0.64 | 0.30     | 0.31     | 1       | 0.11                      | 0.41 | 0.087    | 0.099    | 1       |

119

120 **TEM Images of the Same Cells Measured by PWS in Resin Sections**

121 We compared the low magnification phase-contrast images of the live cells in the Petri dish  
122 (SI Fig 5 (A)) and cell resin sections stained with toluidine blue (SI Fig 5 (B)) to locate the same  
123 cells measured by PWS. Then we took high-resolution TEM images of the same cell on another  
124 section on a carbon/Formvar coated TEM grid (SI Fig 5 (C)). Finally, we stitched multiple images  
125 taken at high magnification to form the whole cells (SI Fig 5(D)) at 7nm resolution. We were able  
126 to recognize nucleoli, mitochondria and vesicles. For finer structures, it was hard to distinguish  
127 the two layers of membrane in the nuclear envelope, which was probably smeared by the sample  
128 preparation protocol.

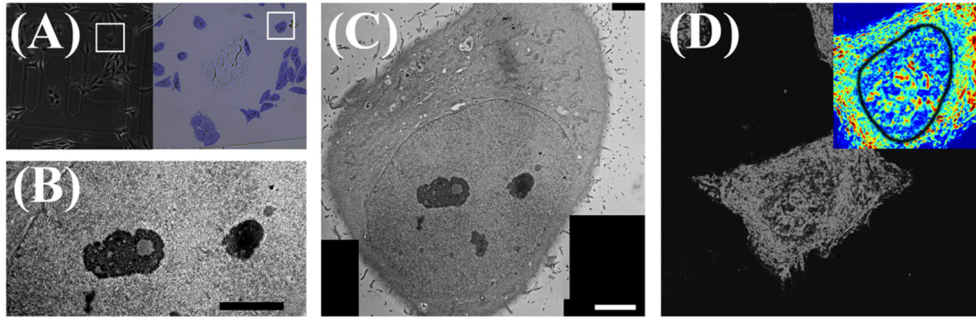

129

130 SI Fig 5 Images of the same cells in thin section as in Fig 1 (E) to (H). (A) Left: phase contrast image of live  
131 *HeLa* cells in a Petri dish. Right: bright field optical micrograph of the resin section containing the same  
132 cells stained. The white box enclosed the same cell as in (B) to (D). (B) Part of nucleus and nucleoli at  
133 3000x magnification. (C) Whole cell after stitching, scale bar is 5  $\mu\text{m}$  in both TEM images. (D) Gray scale  
134 PWS map of the same cell after serial ethanol dehydration before resin infiltration. The inset shows an  
135 enlarged area with a black contour enclosing roughly the region where TEM images (B) and (C) were taken.

136
